# Supplementary material for: Protein Oxidation in the Lungs of C57BL/6J Mice Following X-Irradiation
Source: Proteomes. 2015 Aug 19;3(3):249–65. doi: 10.3390/proteomes3030249 (PMC5217375; doi:10.3390/proteomes3030249)
Supplement: Supplementary File 1 [file proteomes-03-00249-s001.xlsx]

## Sheet: Sheet1
	Table S1. ProteinProspector results for submitted mass spectrometry data.
Protein	MOWSE	No. peptides	%	%	Mean	Data	No. Hom	MS−Digest	Protein MW	Accession	Species	Protein Name
Hit	Score	No. match	Coverage	TIC	Err	Tol	Prot	Index No.	(Da)/pI	No
Number		% mat			ppm	ppm
		69 pks
1	116000000000000	20/20/29	40.3	29	−13.5	23.1	No	11669	68693/5.7	P07724	MOUSE	Serum albumin
Acc. #: P07724 Species: MOUSE Name: Serum albumin
Index: 11669MW: 68693 Da pI: 5.7
m/z	MH+	Intensity	Delta	Modifications	Start	End	Missed	Sequence
Submitted	Matched		ppm				Cleavages
956.551	956.535	100	17.4		98	105	0	(K) LC(Carbamidomethyl)AIPNLR(E)
1250.55	1250.58	100	−25.4		35	44	0	(R) YNDLGEQHFK(G)
1299.7	1299.71	100	−2.36		362	372	0	(R) HPDYSVSLLLR(L)
1439.75	1439.79	100	−24		439	452	0	(K) APQVSTPTLVEAAR(N)
1455.79	1455.81	100	−14.7		361	372	1	(R) RHPDYSVSLLLR(L)
1479.79	1479.8	100	−5.16		422	434	0	(K) LGEYGFQNAILVR(Y)
1609.78	1609.79	100	−8.19		348	360	0	(K) DVFLGTFLYEYSR(R)
1662.84	1662.85	100	−9.96		470	483	0	(R) LPC(Carbamidomethyl)VEDYLSAILNR(V)
1681.8	1681.84	100	−28.5		243	257	0	(R) LSQTFPNADFAEITK(L)
1697.75	1697.77	100	−12.7	1Gln−>pyro−Glu	118	130	1	(K)QEPERNEC(Carbamidomethyl)FLQHK(D)
1714.77	1714.8	100	−12.9		118	130	1	(K) QEPERNEC(Carbamidomethyl)FLQHK(D)
1850.72	1850.78	100	−29.9		570	584	0	(K) TVMDDFAQFLDTC(Carbamidomethyl)C(Carbamidomethyl)K(A)
1882.92	1882.94	100	−10.1		509	524	0	(R) RPC(Carbamidomethyl)FSALTVDETYVPK(E)
1901.87	1901.9	100	−11.9		153	168	0	(K) ENPTTFMGHYLHEVAR(R)
1917.84	1917.89	100	−28.1	1Oxidation	153	168	0	(K)ENPTTFMGHYLHEVAR(R)
1955.02	1955.05	100	−15.6		89	105	1	(K) SLHTLFGDKLC(Carbamidomethyl)AIPNLR(E)
1981.88	1981.93	100	−22.1		585	602	1	(K) AADKDTC(Carbamidomethyl)FSTEGPNLVTR(C)
2152.99	2153.02	100	−14.2		528	545	1	(K) AETFTFHSDIC(Carbamidomethyl)TLPEKEK(Q)
2261.97	2261.96	100	3.5		268	286	1	(K) EC(Carbamidomethyl)C(Carbamidomethyl)HGDLLEC(Carbamidomethyl)ADDRAELAK(Y)
2538.09	2538.13	100	−14.1		131	152	0	(K) DDNPSLPPFERPEAEAMC(Carbamidomethyl)TSFK(E)
The matched peptides cover 40.3% (245/608AA's) of the protein.
Protein	MOWSE	No. peptides	%	%	Mean	Data	No. Hom	MS−Digest	Protein MW	Accession	Species	Protein Name
Hit	Score	No. match	Coverage	TIC	Err	Tol	Prot	Index No.	(Da)/pI	No
Number		% mat			ppm	ppm
		107 pks
1	121000000	2010-12-11	33.5	10.3	−0.942	38.9	1	400186	52514/5.9	P17563	MOUSE	Selenium−binding protein 1
Acc. #: P17563 Species: MOUSE Name: Selenium-binding protein 1
Index: 400186MW: 52514 Da pI: 5.9
m/z	MH+	Intensity	Delta	Modifications	Start	End	Missed	Sequence
Submitted	Matched		ppm				Cleavages
1051.55	1051.56	100	−7.9		412	419	0	(K) QFYPDLIR(E)
1149.6	1149.58	100	9.92		228	235	0	(R) IFVWDWQR(H)
1214.63	1214.63	100	0.868		53	62	0	(K) SPQYSQVIHR(L)
1233.64	1233.65	100	−2.01		104	114	0	(R) IYVVDVGSEPR(A)
1330.76	1330.78	100	−14.5		345	357	0	(R) LAGQIFLGGSIVR(G)
1454.73	1454.73	100	−2.69		24	34	0	(R) EEIVYLPC(Carbamidomethyl)IYR(N)
1689.81	1689.8	100	7.6		212	227	0	(K) DGFNPAHVEAGLYGSR(I)
1709.88	1709.94	100	−33.6		383	398	1	(R) IPGGPQMIQLSLDGKR(L)
1709.88	1709.94	100	−33.6		382	397	1	(K) RIPGGPQMIQLSLDGK(R)
2220.27	2220.21	100	28.6		236	254	0	(R) HEIIQTLQMTDGLIPLEIR(F)
2405.22	2405.17	100	20.4		255	276	0	(R) FLHDPSATQGFVGC(Carbamidomethyl)ALSSNIQR(F)
2547.41	2547.37	100	15.5		438	460	1	(K) LNPNFLVDFGKEPLGPALAHELR(Y)
The matched peptides cover 33.5% (158/472AA's) of the protein.
Protein	MOWSE	No. pep	%	%	Mean	Data	# Hom	MS−Digest	Protein MW	Accession	Species	Protein Name
Hit	Score	No. mat	Cov	TIC	Err	Tol	Prot	Index number	(Da)/pI	number
Number		% mat			ppm	ppm
		119 pks
1	419389	2008-09-09	26	7.6	0.0796	40.5	1	1835	45824/5.3	Q00896	MOUSE	Alpha−1−antitrypsin 1−3
Acc. #: Q00896 Species: MOUSE Name: Alpha-1-antitrypsin 1−3
Index: 1835MW: 45824 Da pI: 5.3
m/z	MH+	Intensity	Delta	Modifications	Start	End	Missed	Sequence
Submitted	Matched		ppm				Cleavages
981.568	981.563	100	4.93		301	308	0	(R) LAQIHFPR(L)
1088.6	1088.61	100	−13.6		319	328	0	(K) TLMSPLGITR(I)
1104.59	1104.61	100	−16.7	1Oxidation	319	328	0	(K)TLMSPLGITR(I)
1137.66	1137.66	100	−4.28		300	308	1	(R) RLAQIHFPR(L)
1232.7	1232.74	100	−32		288	297	1	(K) ELISKFLLNR(R)
1999.07	1999.09	100	−8.05		193	209	1	(K) KLDQDTVFALANYILFK(G)
2003.05	2003.01	100	19.3		329	347	0	(R) IFNNGADLSGITEENAPLK(L)
2327.15	2327.09	100	24.7		154	173	1	(K) NHYQAEVFSVNFAESEEAKK(V)
2405.24	2405.17	100	26.4		36	57	0	(K) DQSPASHEIATNLGDFAISLYR(E)
The matched peptides cover 26.0% (107/412AA's) of the protein.
Protein	MOWSE	No. pep	%	%	Mean	Data	# Hom	MS−Digest	Protein MW	Accession	Species	Protein Name
Hit	Score	No. mat	Cov	TIC	Err	Tol	Prot	Index number	(Da)/pI	number
Number		% mat			ppm	ppm
		73 pks
1	15100000	2012-09-09	29.6	12.3	−8.52	24	No	7568	41737/5.3	Q71FK5	CAVPO	Actin, cytoplasmic 1
Acc. #: Q71FK5 Species: CAVPO Name: Actin, cytoplasmic 1
Index: 7568MW: 41737 Da pI: 5.3
m/z	MH+	Intensity	Delta	Modifications	Start	End	Missed	Sequence
Submitted	Matched		ppm				Cleavages
976.452	976.448	100	3.8		19	28	0	(K) AGFAGDDAPR(A)
1171.55	1171.57	100	−15.7		40	50	0	(R) HQGVMVGMGQK(D)
1198.7	1198.71	100	−7.26		29	39	0	(R) AVFPSIVGRPR(H)
1499.66	1499.68	100	−13.1	1Gln−>pyro−Glu	360	372	0	(K)QEYDESGPSIVHR(K)
1515.73	1515.75	100	−12.5		85	95	0	(K) IWHHTFYNELR(V)
1516.71	1516.7	100	5.43		360	372	0	(K) QEYDESGPSIVHR(K)
1790.87	1790.89	100	−10.2		239	254	0	(K) SYELPDGQVITIGNER(F)
1954	1954.06	100	−31.8		96	113	0	(R) VAPEEHPVLLTEAPLNPK(A)
2215.08	2215.07	100	4.58		292	312	0	(K) DLYANTVLSGGTTMYPGIADR(M)
The matched peptides cover 29.6% (111/375AA's) of the protein.
Protein	MOWSE	No. pep	%	%	Mean	Data	# Hom	MS−Digest	Protein MW	Accession	Species	Protein Name
Hit	Score	No. mat	Cov	TIC	Err	Tol	Prot	Index number	(Da)/pI	number
Number		% mat			ppm	ppm
		88 pks
1	53200000	2010-09-09	50.4	10.2	−2.26	33	No	45292	29033/6.5	P00920	MOUSE	Carbonic anhydrase 2
Acc. #: P00920 Species: MOUSE Name: Carbonic anhydrase 2
Index: 45292MW: 29033 Da pI: 6.5
m/z	MH+	Intensity	Delta	Modifications	Start	End	Missed	Sequence
Submitted	Matched		ppm				Cleavages
951.469	951.453	100	16.7		81	89	0	(K) GGPLSDSYR(L)
1043.49	1043.47	100	16.5	1Met−loss+Acetyl	1	9	0	(−)MSHHWGYSK(H)
1581.77	1581.82	100	−29.8		114	126	0	(K) YAAELHLVHWNTK(Y)
1647.76	1647.78	100	−9.91		213	226	0	(R) EPITVSSEQMSHFR(T)
1663.76	1663.77	100	−6.88	1Oxidation	213	226	0	(R)EPITVSSEQMSHFR(T)
1668.93	1668.97	100	−20.1		133	148	0	(K) AVQQPDGLAVLGIFLK(I)
2511.17	2511.18	100	−3.14		90	111	0	(R) LIQFHFHWGSSDGQGSEHTVNK(K)
2549.19	2549.19	100	1.42		58	80	0	(K) SIVNNGHSFNVEFDDSQDNAVLK(G)
2874.38	2874.34	100	14.9		227	251	0	(R) TLNFNEEGDAEEAMVDNWRPAQPLK(N)
The matched peptides cover 50.4% (131/260AA's) of the protein.
Protein	MOWSE	No. pep	%	%	Mean	Data	# Hom	MS−Digest	Protein MW	Accession	Species	Protein Name
Hit	Score	No. mat	Cov	TIC	Err	Tol	Prot	Index number	(Da)/pI	number
Number		% mat			ppm	ppm
		82 pks
1	4260000000	16/15/18	75	19.5	−15.8	30.5	No	290551	24871/5.7	O08709	MOUSE	Peroxiredoxin−6
Acc. #: O08709 Species: MOUSE Name: Peroxiredoxin-6
Index: 290551MW: 24871 Da pI: 5.7
m/z	MH+	Intensity	Delta	Modifications	Start	End	Missed	Sequence
Submitted	Matched		ppm				Cleavages
906.485	906.468	100	18.8		156	162	0	(R) NFDEILR(V)
1021.57	1021.57	100	−0.582		133	141	0	(R) VVFIFGPDK(K)
1045.57	1045.6	100	−33		54	63	1	(R) AAKLAPEFAK(R)
1057.58	1057.59	100	−11.2		98	106	0	(K) LPFPIIDDK(G)
1149.65	1149.67	100	−11.7		133	142	1	(R) VVFIFGPDKK(L)
1191.67	1191.67	100	−2.27		145	155	0	(K) LSILYPATTGR(N)
1270.71	1270.72	100	−7.47		98	108	1	(K) LPFPIIDDKGR(D)
1395.64	1395.66	100	−10.7		42	53	0	(R) DFTPVC(Carbamidomethyl)TTELGR(A)
1526.81	1526.85	100	−28.8		109	122	0	(R) DLAILLGMLDPVEK(D)
1542.8	1542.84	100	−29.8	1Oxidation	109	122	0	(R)DLAILLGMLDPVEK(D)
1739.96	1739.97	100	−7.25		107	122	1	(K) GRDLAILLGMLDPVEK(D)
1832.89	1832.93	100	−20.5		183	199	1	(K) KGESVMVVPTLSEEEAK(Q)
1896.94	1897.01	100	−32.6		68	84	0	(K) LIALSIDSVEDHLAWSK(D)
2030.92	2030.99	100	−33.2		25	41	0	(R) FHDFLGDSWGILFSHPR(D)
2142.06	2142.08	100	−8.9	1Met−loss	1	22	0	(−)MPGGLLLGDEAPNFEANTTIGR(I)
2154.11	2154.18	100	−34.6		163	182	0	(R) VVDSLQLTGTKPVATPVDWK(K)
The matched peptides cover 75.0% (168/224AA's) of the protein.
Protein	MOWSE	No. pep	%	%	Mean	Data	# Hom	MS−Digest	Protein MW	Accession	Species	Protein Name
Hit	Score	No. mat	Cov	TIC	Err	Tol	Prot	Index number	(Da)/pI	number
Number		% mat			ppm	ppm
		62 pks
1	17900000	15/15/24	42.8	24.2	−5.99	14	No	16394	30588/5.6	Q00623	MOUSE	Apolipoprotein A-I
Acc. #: Q00623 Species: MOUSE Name: Apolipoprotein A-I
Index: 16394MW: 30588 Da pI: 5.6
m/z	MH+	Intensity	Delta	Modifications	Start	End	Missed	Sequence
Submitted	Matched		ppm				Cleavages
1040.59	1040.58	100	1.9		228	236	0	(K) ARPALEDLR(H)
1047.55	1047.55	100	−0.989		164	172	0	(R) LSPVAEEFR(D)
1066.48	1066.48	100	−3.38		93	100	0	(R) DFWDNLEK(E)
1082.6	1082.6	100	2.97	1Gln−>pyro−Glu	155	163	1	(R)QKLQELQGR(L)
1099.62	1099.62	100	−5.94		155	163	1	(R) QKLQELQGR(L)
1179.59	1179.6	100	−5.62		133	141	1	(K) EDVELYRQK(V)
1237.62	1237.62	100	−2.72		131	139	1	(K) WKEDVELYR(Q)
1266.61	1266.64	100	−19.4		120	129	0	(K) VQPYLDEFQK(K)
1297.63	1297.63	100	−2.96		184	194	0	(R) TQLAPHSEQMR(E)
1318.67	1318.67	100	−6.44		164	174	1	(R) LSPVAEEFRDR(M)
1331.62	1331.63	100	−9.73		206	216	0	(K) SNPTLNEYHTR(A)
1340.71	1340.72	100	−6.31		142	154	0	(K) VAPLGAELQESAR(Q)
1394.71	1394.73	100	−14.4		120	130	1	(K) VQPYLDEFQKK(W)
1467.76	1467.78	100	−18.8		34	46	1	(K) VKDFANVYVDAVK(D)
1852.85	1852.85	100	1.97		93	106	1	(R) DFWDNLEKETDWVR(Q)
The matched peptides cover 42.8% (113/264AA's) of the protein.
